# Supplementary material for: Pollen-based temperature and precipitation changes in the Ohrid Basin (western Balkans) between 160 and 70 ka
Source: Copernicus journal article supplement (doi:10.5194/cp-15-53-2019), 2019-01-11
Supplement: Supplementary file [file cp-15-53-2019-supplement-title-page.pdf › cp-15-53-2019-supplement-title-page.pdf]

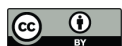

## *Supplement of*

# **Pollen-based temperature and precipitation changes in the Ohrid Basin (western Balkans) between 160 and 70 ka**

**Gaia Sinopoli et al.**

*Correspondence to:* Alessia Masi ([alessia.masi@uniroma1.it](mailto:alessia.masi@uniroma1.it))

- [cp-15-53-2019-supplement-title-page.pdf](#)
- [figure S1.eps](#)
- [figure S2.eps](#)
- [figure S3.eps](#)

The copyright of individual parts of the supplement might differ from the CC BY 4.0 License.
